# Supplementary material for: Ag-embedded manganese oxide octahedral molecular sieve (Ag-OMS-2) nano-rods as efficient heterogeneous catalysts for hydration of nitriles to amides in aqueous solution
Source: Royal Society of Chemistry journal article supplement (doi:10.1039/d3ra00292f), 2023-01-01
Supplement: d3ra00292f1.pdf [file d3ra00292f1.pdf]

## Supporting Information

**Ag-embedded Manganese oxide octahedral molecular sieve (Ag-OMS-2) nano-rods as efficient heterogeneous catalysts for hydration of nitriles to amides in aqueous solution**

**Farimah Mazloom Kalimani <sup>a</sup> and Alireza Khorshidi <sup>\*a</sup>**

# Benzamide

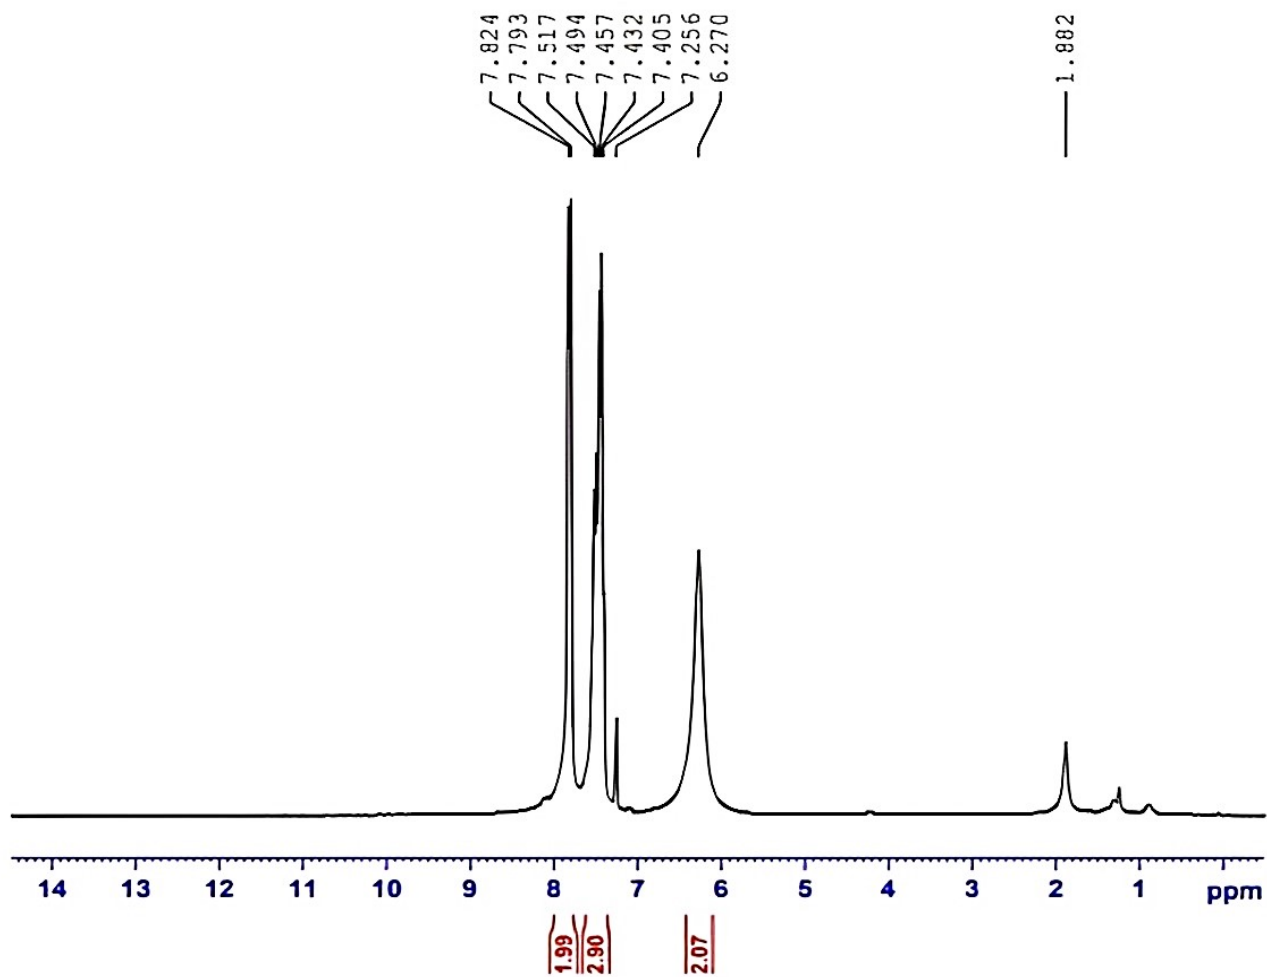

<sup>1</sup>H NMR spectrum of benzamide (250 MHz, CDCl<sub>3</sub>)

# 4-Chlorobenzamide

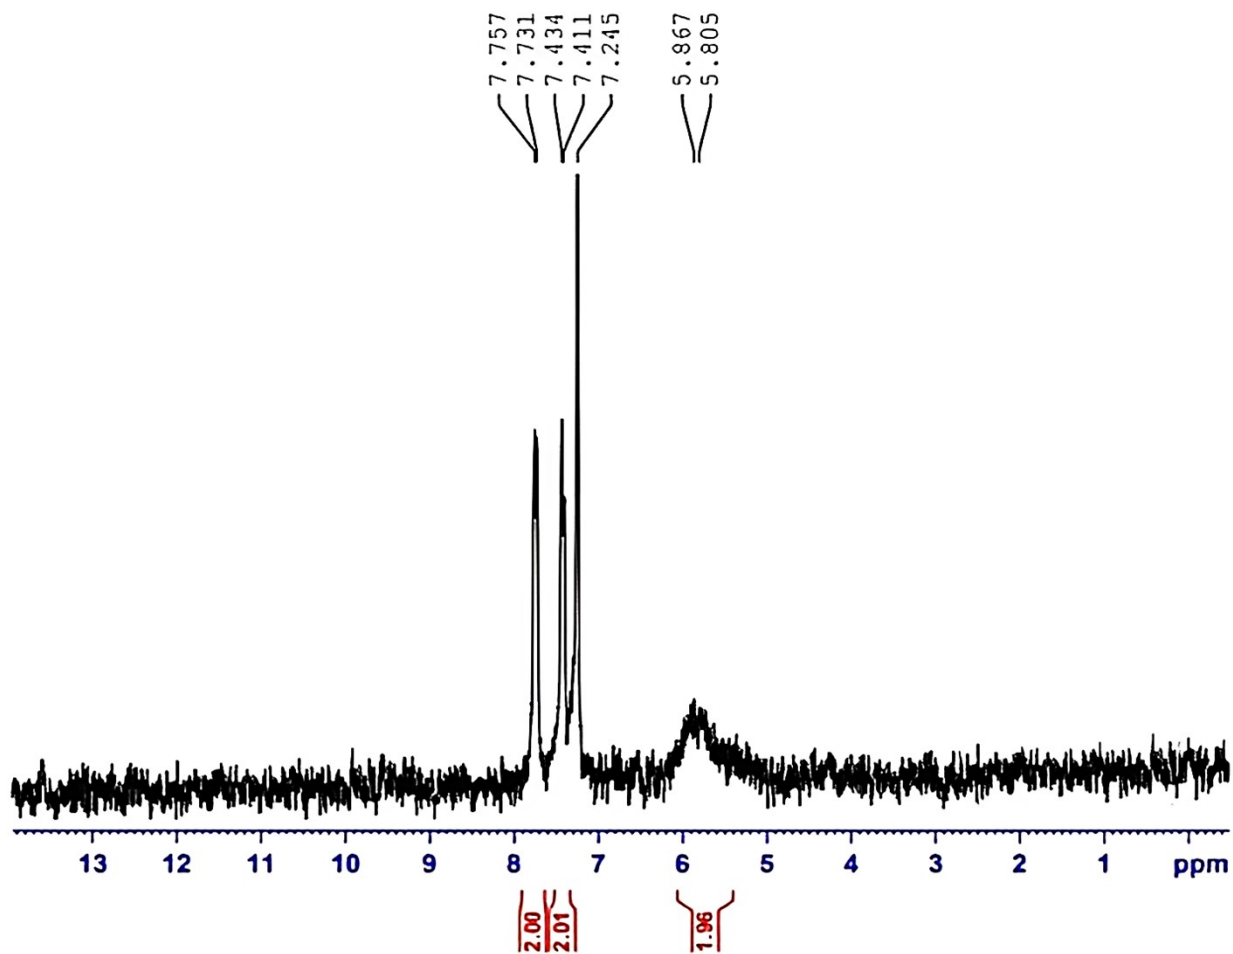

<sup>1</sup>H NMR spectrum of 4-Chlorobenzamide (250 MHz, CDCl<sub>3</sub>)

## 2-Chlorobenzamide

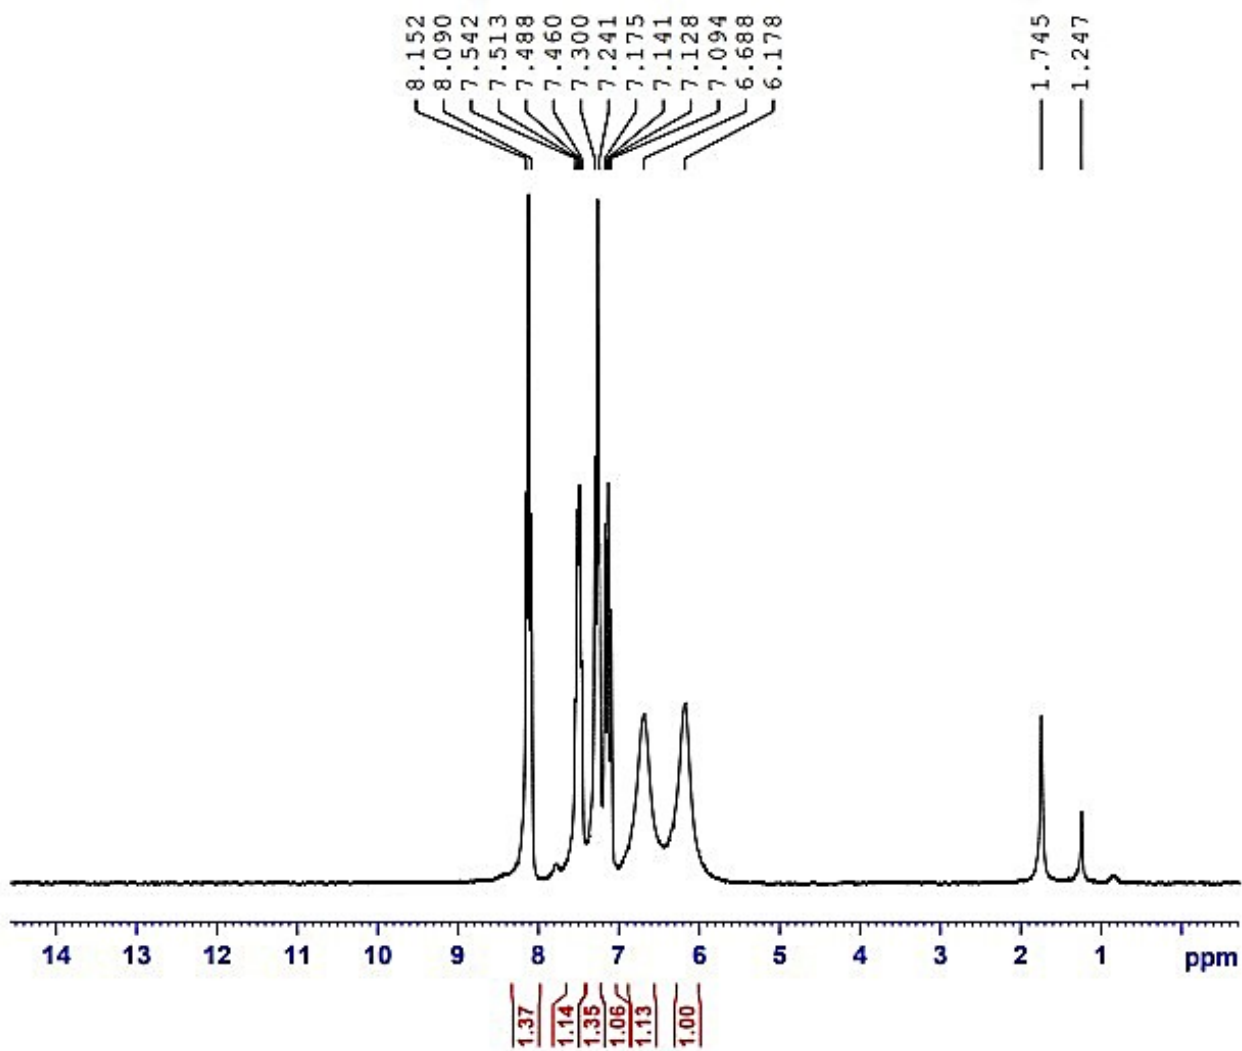

$^1\text{H}$ NMR spectrum of 2-Chlorobenzamide (250 MHz,  $\text{CDCl}_3$ )

### 3-Chlorobenzamide

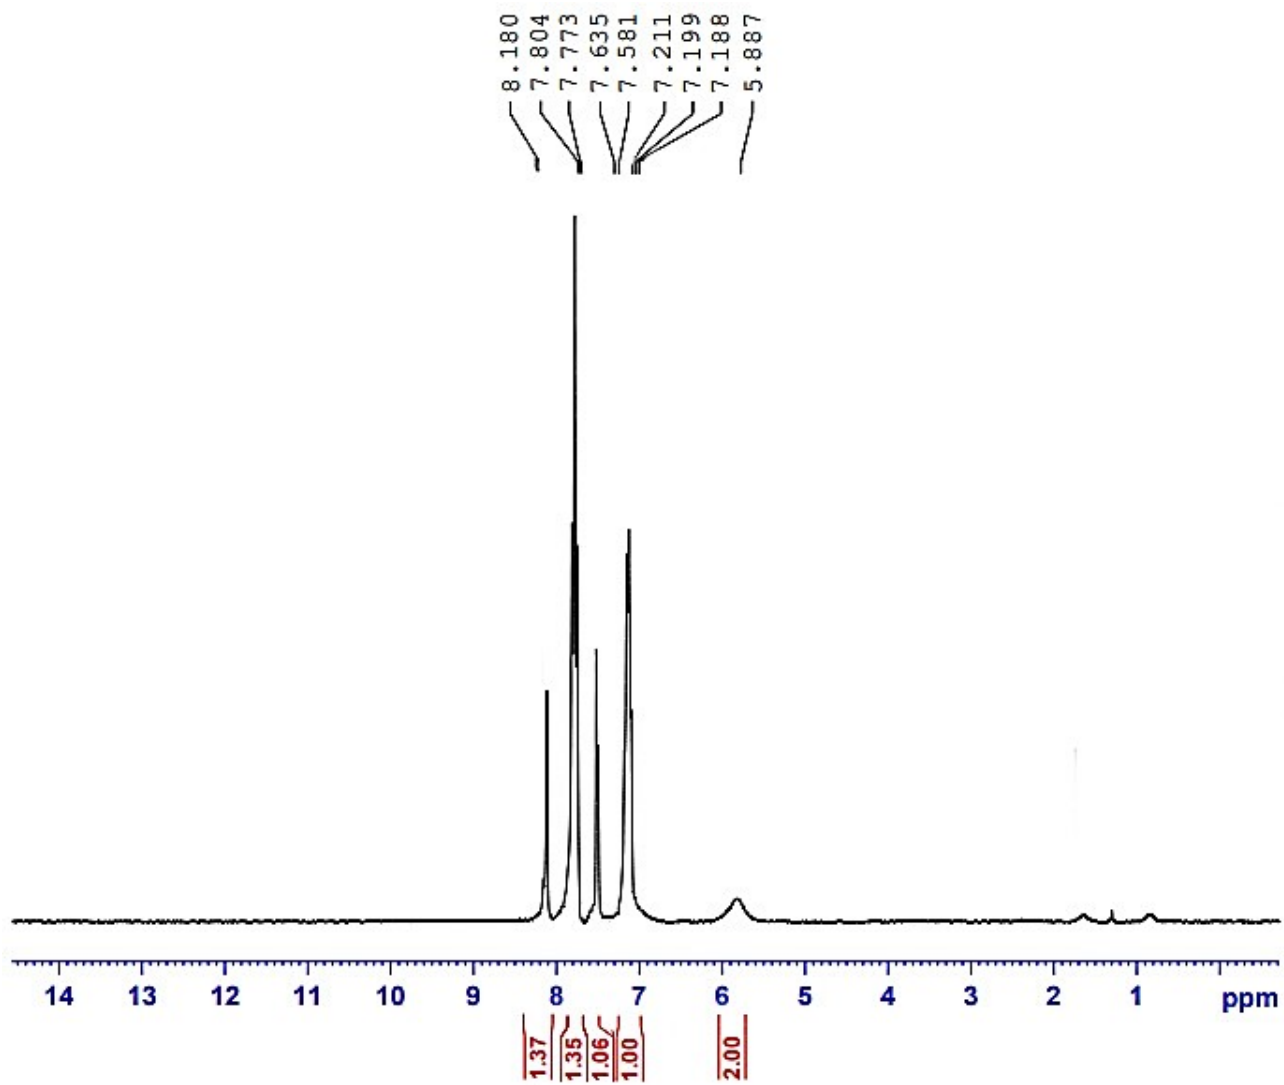

<sup>1</sup>H NMR spectrum of 3-Chlorobenzamide (250 MHz, CDCl<sub>3</sub>)

# 4-Bromobenzamide

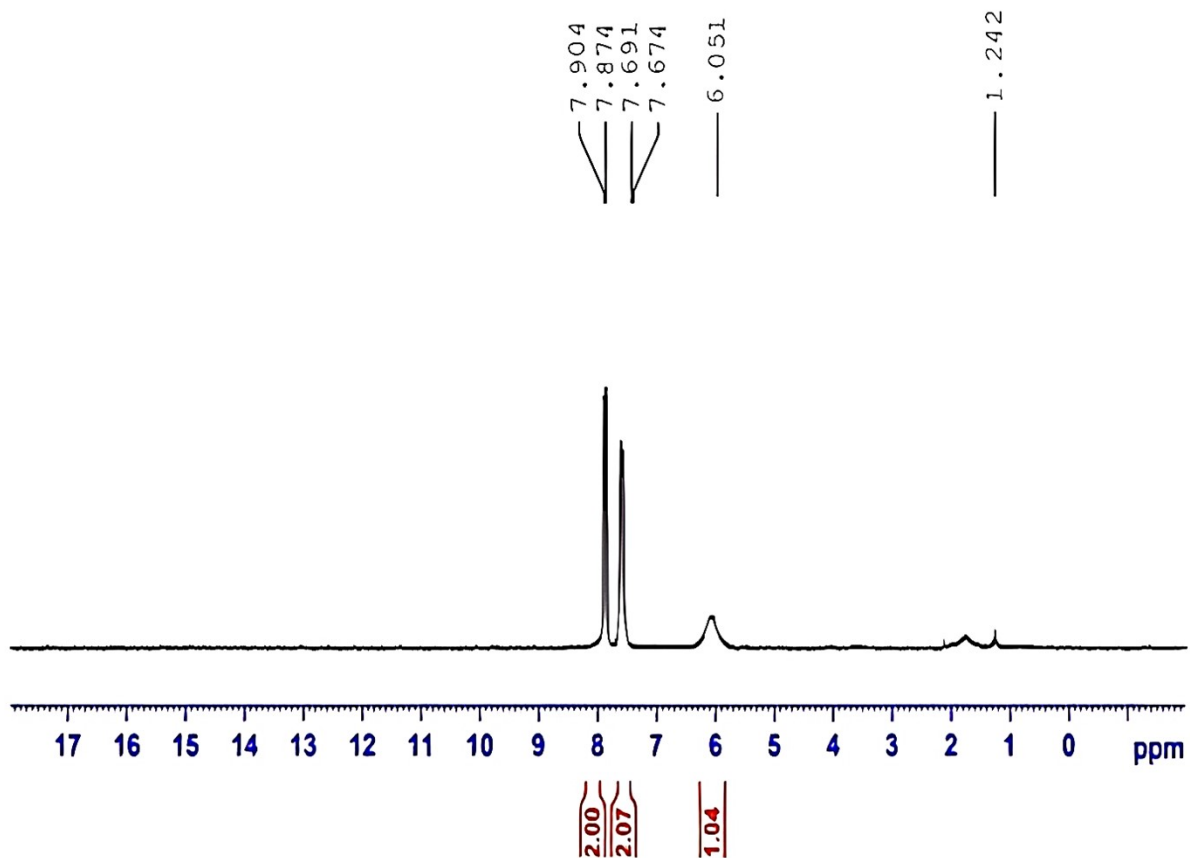

<sup>1</sup>H NMR spectrum of 4-Bromobenzamide (250 MHz, CDCl<sub>3</sub>)

# 4-Fluorobenzamide

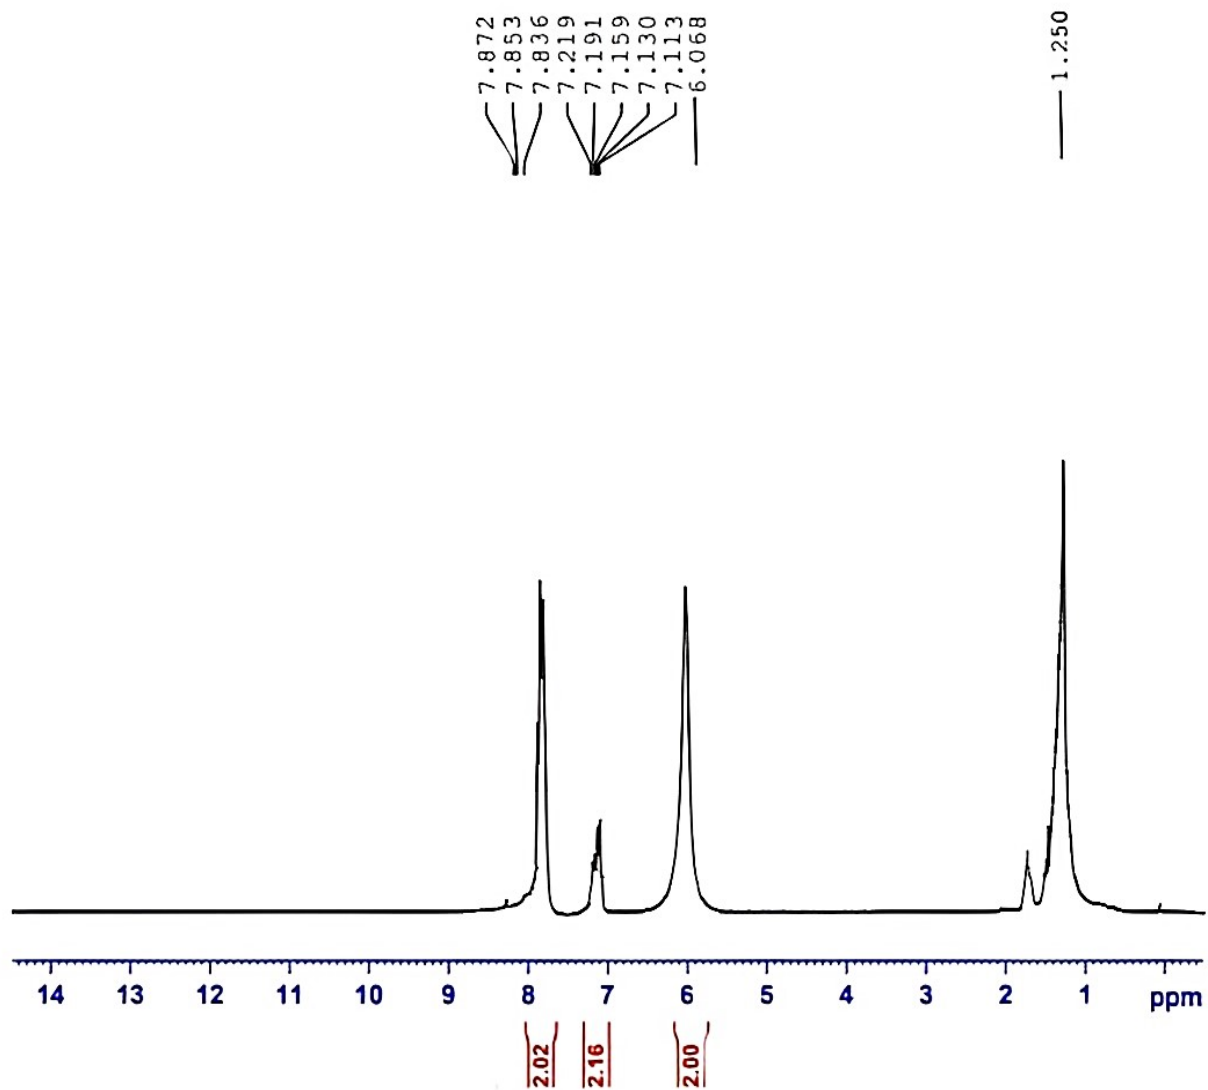

<sup>1</sup>H NMR spectrum of 4-Fluorobenzamide (250 MHz, CDCl<sub>3</sub>)

# 4-Methoxybenzamide

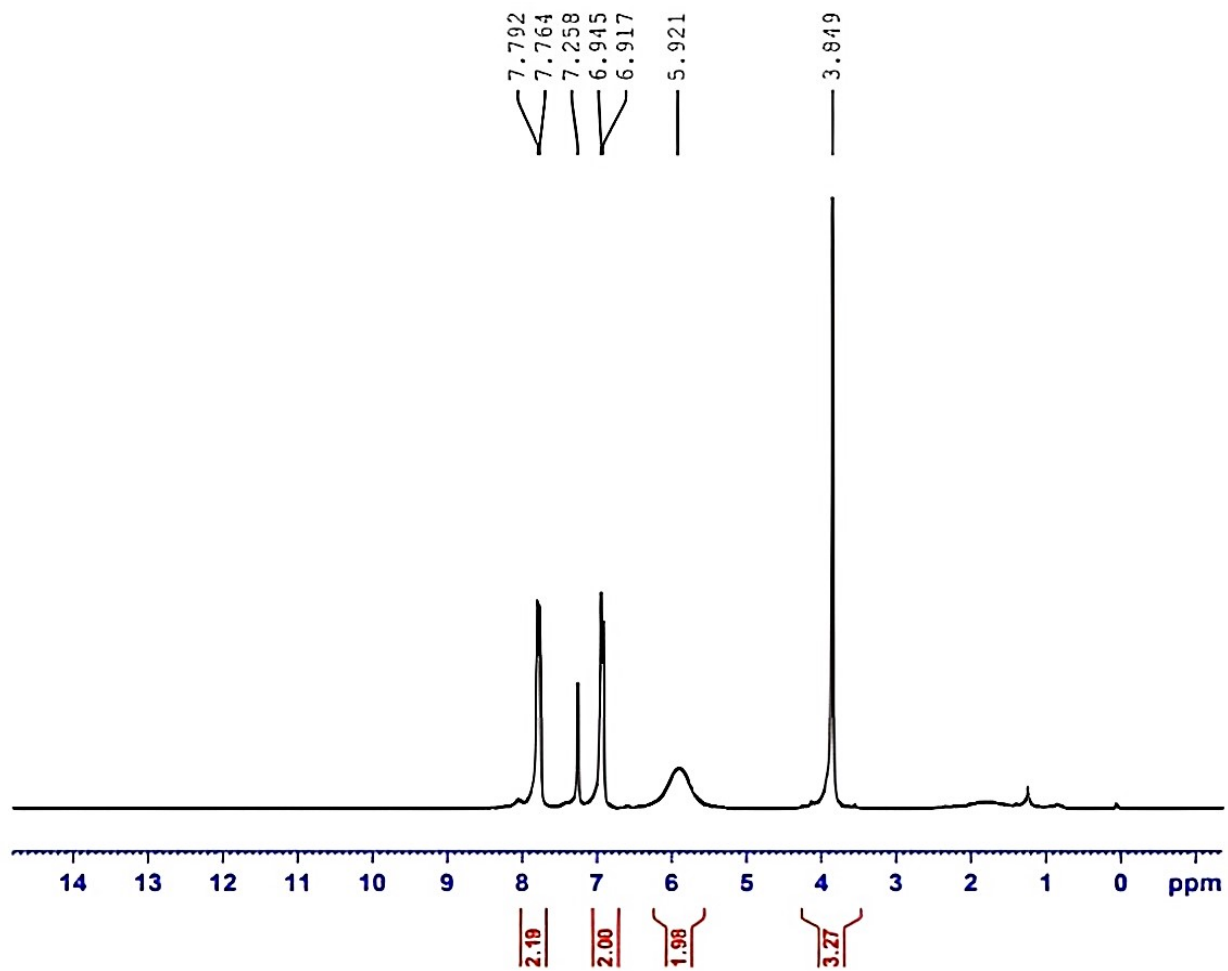

<sup>1</sup>H NMR spectrum of 4-Methoxybenzamide (250 MHz, CDCl<sub>3</sub>)



# 4-Nitrobenzamide

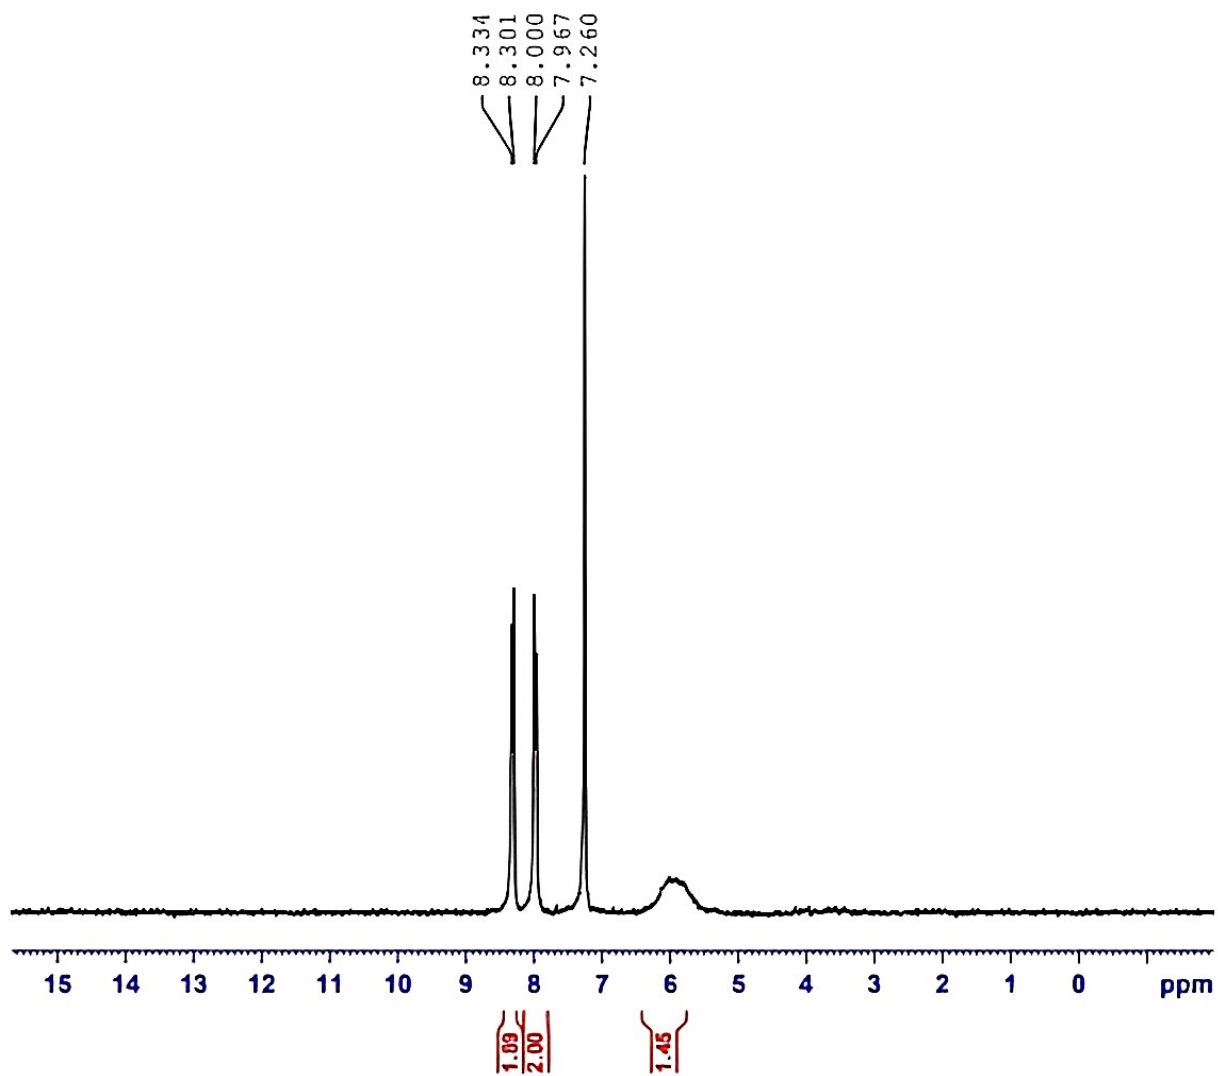

<sup>1</sup>H NMR spectrum of 4-Nitrobenzamide (250 MHz, CDCl<sub>3</sub>)

# 4-Methylbenzamide

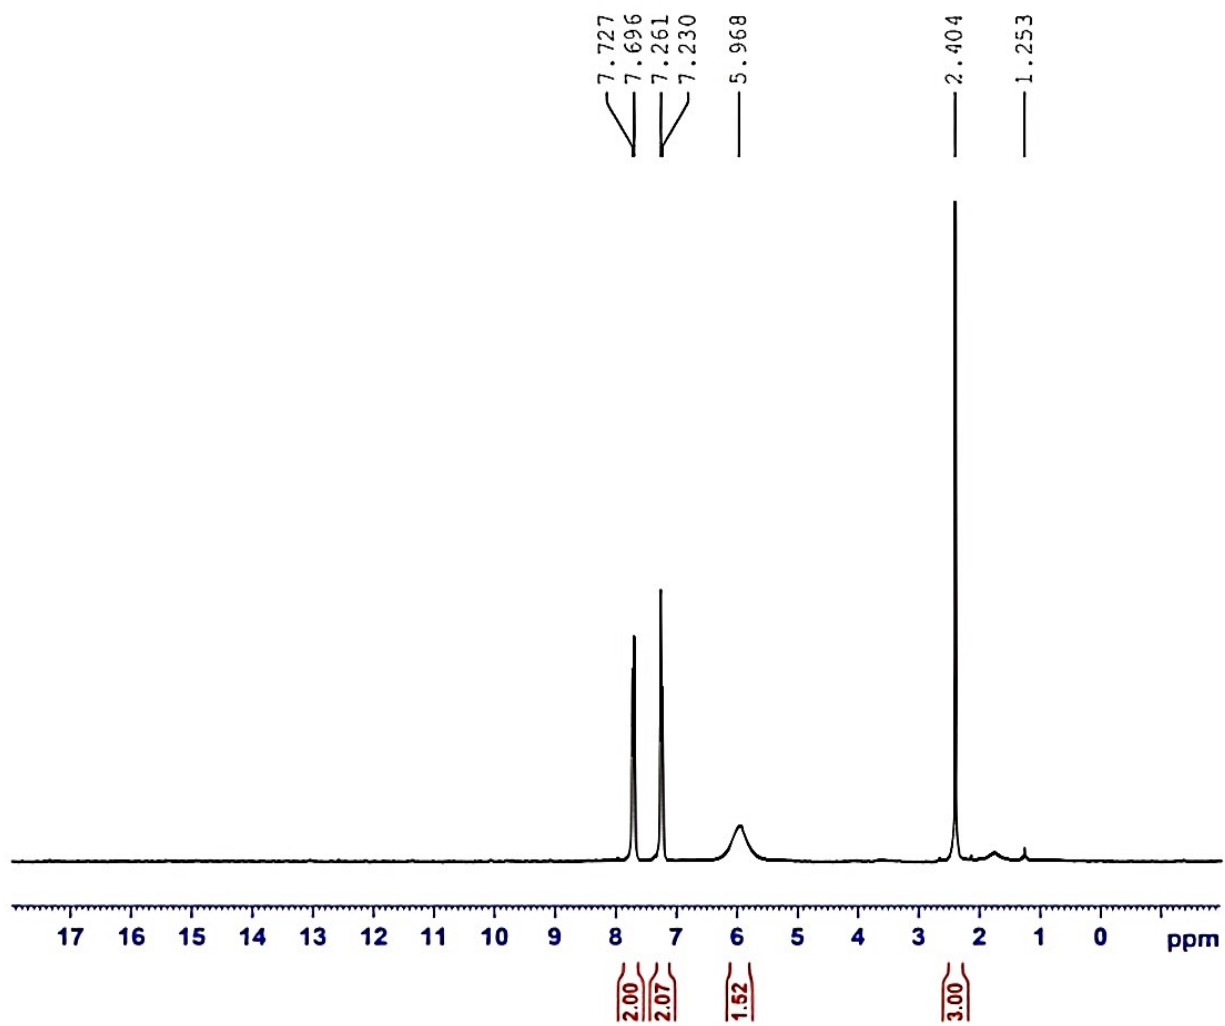

$^1\text{H}$ NMR spectrum of 4-Methylbenzamide (250 MHz,  $\text{CDCl}_3$ )

# Acetamide

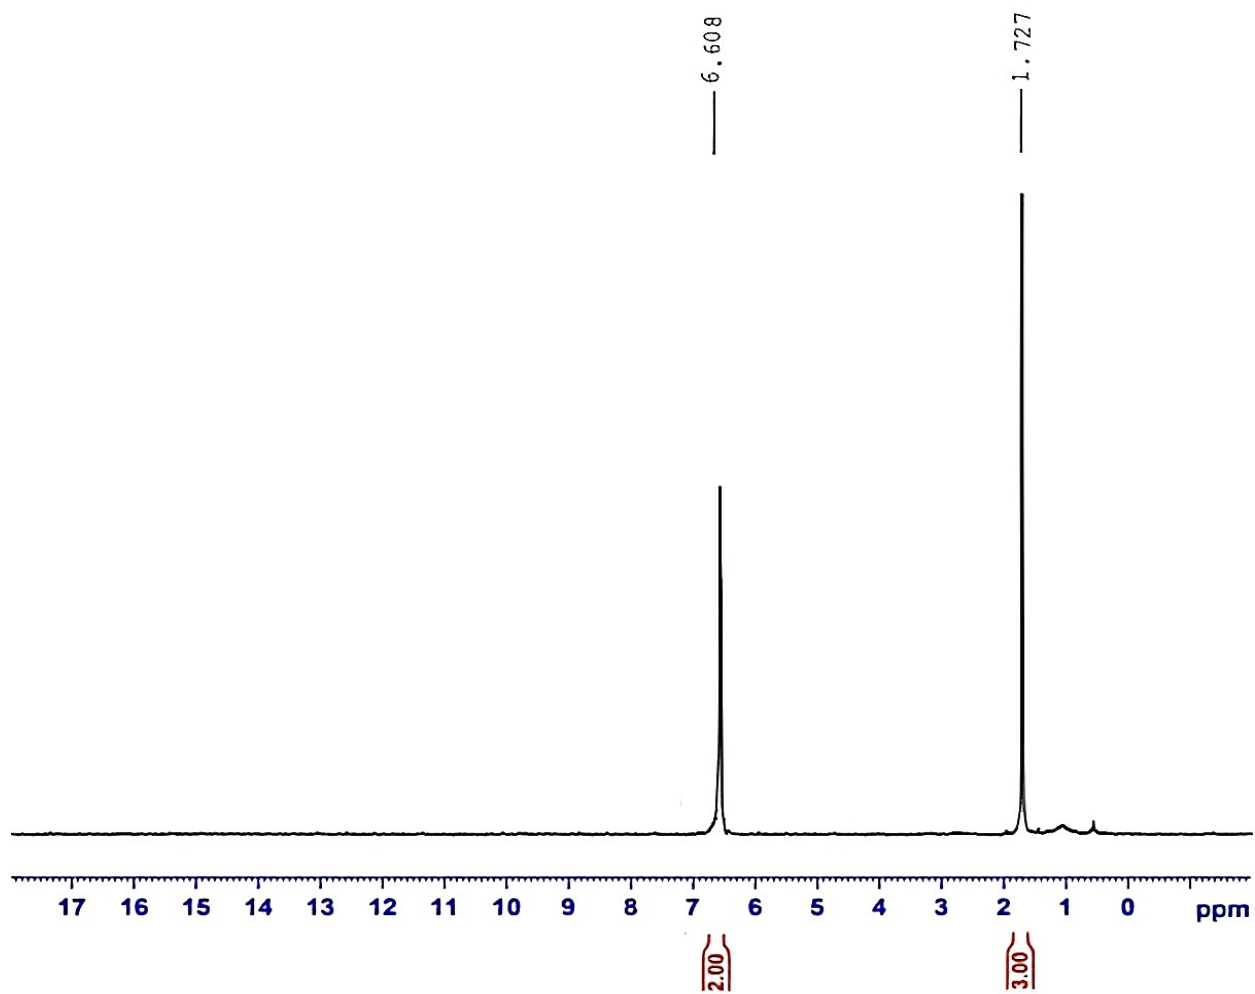

$^1\text{H}$ NMR spectrum of Acetamide (250 MHz,  $\text{DMSO-}d_6$ )

# Acrylamide

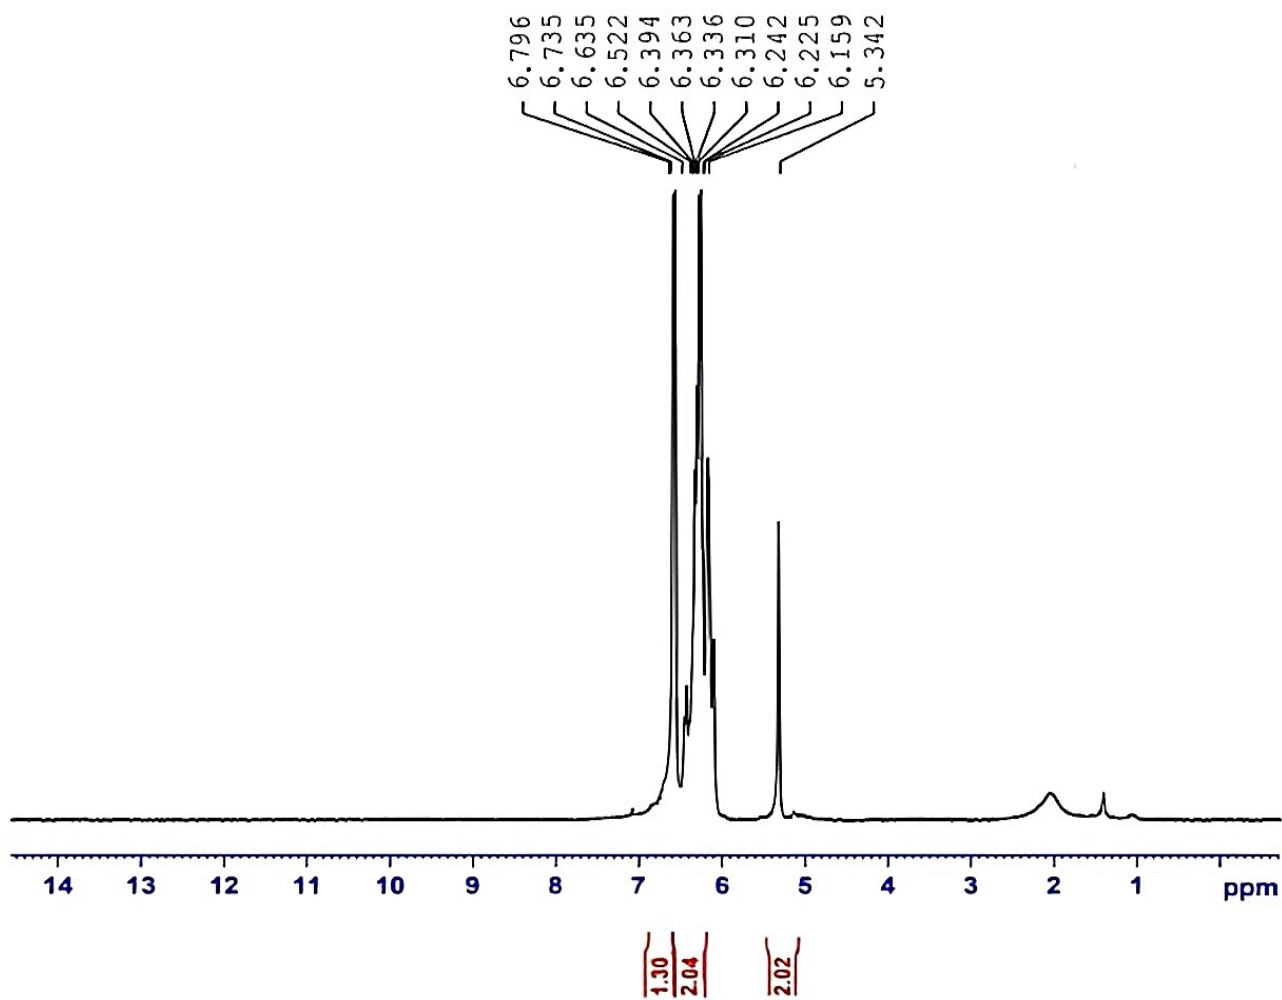

$^1\text{H}$ NMR spectrum of Acrylamide (250 MHz,  $\text{DMSO-}d_6$ )

# Nicotinamide

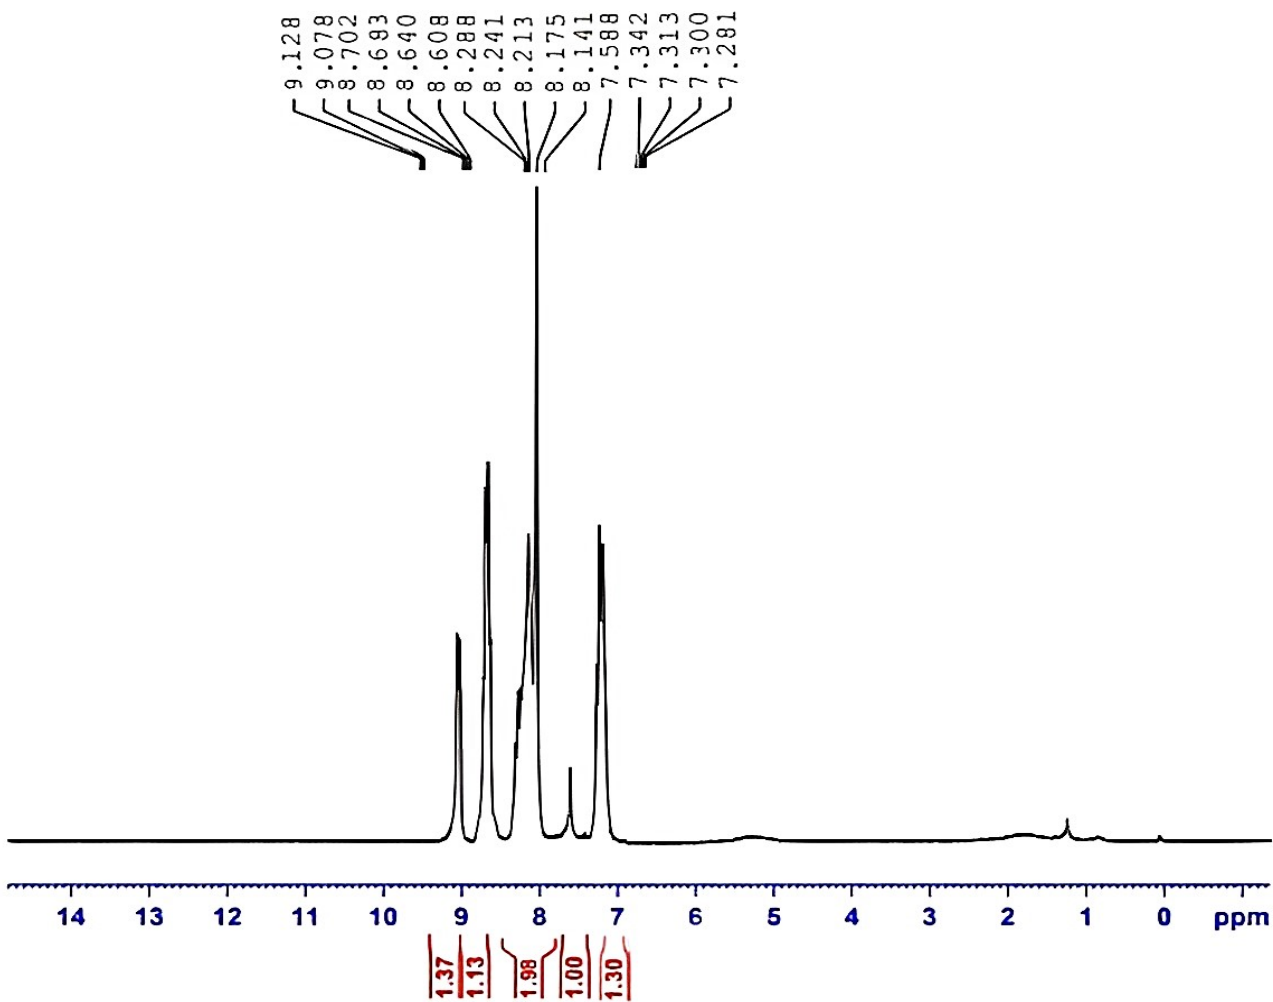

<sup>1</sup>H NMR spectrum of Nicotinamide (250 MHz, DMSO-d<sub>6</sub>)

# Thiophene-2-carboxamide

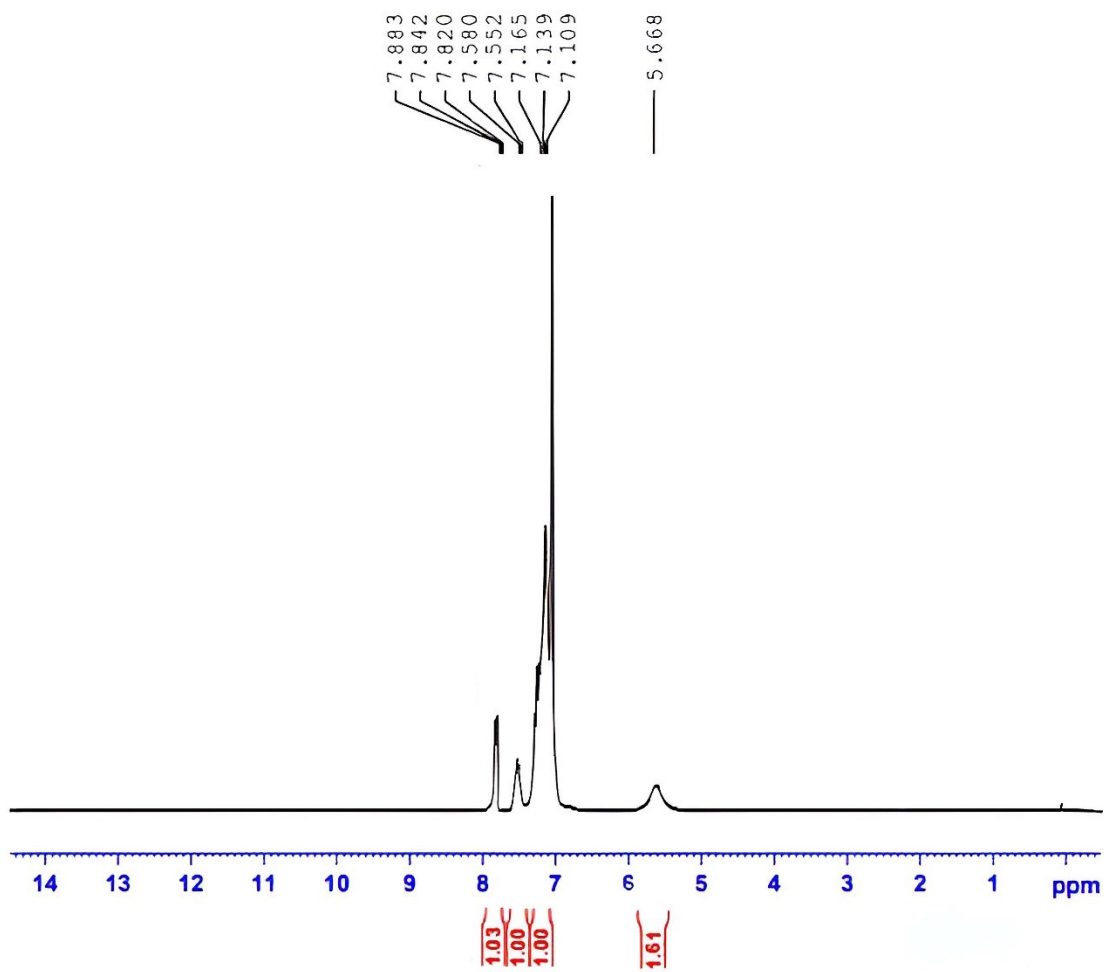

<sup>1</sup>H NMR spectrum of Thiophene-2-carboxamide (250 MHz, CDCl<sub>3</sub>)
